# Supplementary material
Source: publisher figshare collection journal article supplement (https://acs.figshare.com/ndownloader/files/4182310)

## **Supplemental Information**

### **Cytochrome P450 11A1-Mediated Bioactivation of a Kinase Inhibitor in Rats. Use of Metabolite Radioprofiling, Modulation of Metabolism and Adrenocortical Cell Lines to Evaluate Adrenal Toxicity Potential**

Donglu Zhang, Oliver Flint, Lifei Wang, Ashok Gupta, Richard Westhouse, Weiping Zhao, Nirmala Raghavan, Janet Caceres-Cortes, Punit Marathe, Guoxiang Shen, Yueping Zhang, Alban Allentoff, Jonathan Joseph, Jinping Gan, Robert Borzilleri, W Griffith Humphreys

## Table of Contents

|                                                                                                                                                                                                                                                              |      |
|--------------------------------------------------------------------------------------------------------------------------------------------------------------------------------------------------------------------------------------------------------------|------|
| Metabolite Identification.....                                                                                                                                                                                                                               | S-3  |
| Table 1S. Recovery of radioactivity in bile, urine, feces, and GI tract of BDC rats following oral administration of [ <sup>14</sup> C]BMS-A (15 mg/kg, 199.5 μCi/kg).....                                                                                   | S-6  |
| Table 2SA. Relative percent distribution of radioactivity among various peaks in the radiochromatographic profiles of pooled BMS-A treated rat bile, urine, and feces after oral administration of [ <sup>14</sup> C]BMS-A (15 mg/kg, 199.5 μCi/kg).....     | S-7  |
| Table 2SB. Relative percent distribution of radioactivity among various peaks in the radiochromatographic profiles of pooled BMS-A/ABT-treated rat bile, urine, and feces after oral administration of [ <sup>14</sup> C]BMS-A (15 mg/kg, 199.5 μCi/kg)..... | S-8  |
| Figure 1S. Modified after Rainey et al., Mol. Cell. Endocrin., 228: 23-38 and Stewart, William's Textbook of Endocrin., Larsen et al., Eds.....                                                                                                              | S-9  |
| Figure 2SA. Adrenal cortex of a rat following single daily oral doses of 10 mg/kg BMS-A for 7 days.....                                                                                                                                                      | S-10 |
| Figure 2SB. Adrenal cortex of a rat following a single oral dose of 30 mg/kg BMS-A.....                                                                                                                                                                      | S-11 |
| Figure 3SA: Profiles of radioactivity in bile of rats following oral administration of [ <sup>14</sup> C]BMS-A (15 mg/kg, 199.5 μCi/kg) with and without pretreatment of ABT (1,2,3....= M1, M2, M3....).....                                                | S-12 |
| Figure 3SB: Profiles of radioactivity in urine of rats following oral administration of [ <sup>14</sup> C]BMS-A (15 mg/kg, 199.5 μCi/kg) with and without pretreatment of ABT (1,2,3....=M1, M2, M3....).....                                                | S-13 |
| Figure 3SC: Profiles of radioactivity in feces of rats following oral administration of [ <sup>14</sup> C]BMS-A (15 mg/kg, 199.5 μCi/kg) with and without treatment of ABT (1,2,3....= M1, M2, M3....).....                                                  | S-14 |
| Figure 4SA. HPLC profiles of radioactivity in rat plasma from the BMS-A treated group after oral administration of [ <sup>14</sup> C]BMS-A (15 mg/kg, 199.5 μCi/kg).....                                                                                     | S-15 |
| Figure 4SB. HPLC profiles of radioactivity in plasma from BMS-A/ABT-treated group after oral administration of [ <sup>14</sup> C]BMS-A (15 mg/kg, 199.5 μCi/kg).....                                                                                         | S-16 |
| Figure 5S. Metabolite profiles of radioactivity in the medium after a 24h incubation of [ <sup>14</sup> C]BMS-A (10 μM) with Y1 cell cultures.....                                                                                                           | S-17 |

## Metabolite Identification

M4. This metabolite had a molecular ion  $[M+H]^+$  at m/z 651 (459+16+176) and showed fragment ions at m/z 475 and 216 (Table 4). M4 was proposed as a glucuronide conjugate of a hydroxylated metabolite (modification on the B substructure).

M5 and M26. Metabolite M5 and M26 were detected by LC/MS/MS in bile and urine samples and showed the same molecular  $[M+H]^+$  at m/z 475 (459+16) and fragment ions at m/z 234, 216, 188, and 160 that were the same as those of the parent compound. M26 and M5 were assigned as hydroxylated metabolites (proposed modification on the B substructure).

M6. This metabolite had a molecular ion  $[M+H]^+$  at m/z 651 (459+16+176) and showed fragment ions at m/z 475, 408, 250, 232 (216+16), and 204 (Table 4). M6 was assigned as a glucuronide conjugate of a hydroxylated metabolite (proposed modification on the A substructure).

M7. This metabolite had a molecular ion  $[M+H]^+$  at m/z 651 (459+16+176) and showed fragment ions at m/z 475 and 232 (Table 4). M7 was a glucuronide conjugate of a hydroxylated metabolite (proposed modification on the A substructure).

M8 and M9. This two metabolite had a molecular ion  $[M+H]^+$  at m/z 635 (459+176) and showed fragment ions at m/z 619 or 617 (635-18) and 459 (Table 4). M8 and M9 were glucuronide conjugates of parent compound.

M10. This metabolite had a molecular ion  $[M+H]^+$  at m/z 343 and showed fragment ions at m/z 325, 234, and 216 (Table 4). M10 was consistent with an *O*-dearylation of parent compound.

M11. Metabolite M11 had a molecular ion  $[M+H]^+$  at m/z 475 and showed fragment ions at m/z 232 (216+16), 204 (188+16), and 176 (160+16). M11 was identified as a hydroxylated metabolite (proposed modification on the A substructure).

M12 and M17. Metabolite M12 and M17 showed the same molecular ions  $[M+H]^+$  at m/z 507 ( $M+3 \times 16$ ) and major fragment ions at m/z 463, 435, 343, 325, 234, and 216. The two metabolites were identified as a trihydroxylated BMS-A (proposed modification on the B substructure).

M13. Metabolite M13 had a molecular ion  $[M+H]^+$  at m/z 651 and fragment ions at m/z 633 (651-18), 615, 475 (459+16), 408, 232, and 204. Metabolite M13 was identified as a glucuronide conjugate of a hydroxylated metabolite (proposed modification on the A substructure).

M14. Metabolite M14 had a molecular ion  $[M+H]^+$  at m/z 475 and showed fragment ions at m/z 457 (475-18), 232 (216+16), 204 (188+16), and 176 (160+16). Metabolite M14 was identified as a hydroxylated metabolite (proposed modification on the A substructure).

M15. Metabolite M15 had a molecular ion  $[M+H]^+$  at m/z 651 and showed fragment ions at m/z 475 (651-176), 408, 250 (234+16), and 232 (216+16). Metabolite M15 was

identified as a glucuronide conjugate of a hydroxylated metabolite (proposed modification on the A substructure).

M16. Metabolite M16 had a molecular ion  $[M+H]^+$  at m/z 475 and showed fragment ions at m/z 250 (234+16), 232 (216+16), and 176 (160+16). Metabolite M16 was identified as a hydroxylated metabolite (proposed modification on the A substructure).

M18 and M19. Metabolite M18 and M19 had molecular ions  $[M+H]^+$  at m/z 491 and fragment ions at m/z 473 (491-18), 250 (234+16), 232 (216+16), and 176 (160+16). Metabolite M18 and M19 were identified as dihydroxylated metabolites (proposed modifications on the A and B substructures).

M20 and M21. Metabolites M20 and M21 had a molecular ions  $[M+H]^+$  at m/z 491 and showed fragment ions at m/z 473 (491-18), 234, 216, and 188. M20 and M21 were identified as dihydroxylated metabolites (both modification proposed on the B substructure).

M22, M23, and M24. M22, M23, and M24 had the same molecular ions  $[M+H]^+$  at m/z 667 and fragment ions at m/z 649, 491, 408, and 232. These three metabolites were identified as glucuronide conjugates of dihydroxylated metabolites (proposed modification on the A and B substructures).

M25. Metabolite M25 was detected by LC/MS/MS and showed a molecular ion  $[M+H]^+$  at m/z 234 and fragment ions at m/z 216, 188, and 160 (Table 4). M25 had the same HPLC retention time and identical fragments as a synthetic metabolite standard. M25 was assigned as an amide hydrolysis metabolite. This hydrolysis pathway also formed a non-radioactive amino metabolite that was not detected in this study.

**Table 1S. Recovery of radioactivity in bile, urine, feces, and GI tract of BDC rats following oral administration of [<sup>14</sup>C]BMS-A (15 mg/kg, 199.5 µCi/kg)**

| Group                 |       | Recovery of radioactivity (% of dose) |       |      |       |           |       |
|-----------------------|-------|---------------------------------------|-------|------|-------|-----------|-------|
|                       |       | Urine                                 | Feces | Bile | GI    | Cage Wash | Total |
| BMS-A-treated         | Rat 1 | 1.42                                  | 2.35  | 33.5 | 27.5  | 0.25      | 65.0  |
|                       | Rat 2 | 1.88                                  | 9.49  | 35.0 | 11.9  | 0.23      | 58.5  |
|                       | Rat 3 | 2.29                                  | 16.0  | 17.7 | 11.8  | 3.65      | 51.5  |
|                       | Mean  | 1.86                                  | 9.29  | 28.7 | 17.08 | 1.38      | 58.3  |
|                       | SD    | 0.44                                  | 6.84  | 9.59 | 9.01  | 1.97      | 6.76  |
| BMS-A/<br>ABT-treated | Rat 4 | 1.83                                  | 8.31  | 14.2 | 10.7  | 0.27      | 35.3  |
|                       | Rat 5 | 2.48                                  | 1.00  | 3.26 | 9.86  | 0.43      | 17.0  |
|                       | Rat 6 | 3.89                                  | 2.95  | 7.08 | 9.11  | 0.41      | 23.4  |
|                       | Mean  | 2.73                                  | 4.09  | 8.18 | 9.89  | 0.37      | 25.3  |
|                       | SD    | 1.05                                  | 3.79  | 5.55 | 0.80  | 0.09      | 9.27  |

Table 2SA. Relative percent distribution of radioactivity among various peaks in the radiochromatographic profiles of pooled BMS-A-treated rat bile, urine, and feces after oral administration of [ $^{14}\text{C}$ ]BMS-A (15 mg/kg, 199.5  $\mu\text{Ci/kg}$ )

| Metabolite |                    | Relative distribution (% sample) <sup>a</sup> |                 |       | Relative distribution (% dose) <sup>b</sup> |       |       |
|------------|--------------------|-----------------------------------------------|-----------------|-------|---------------------------------------------|-------|-------|
| M          | [M+H] <sup>+</sup> | Bile                                          | Urine           | Feces | Bile                                        | Urine | Feces |
| M1         | 475                | 2.1                                           | 0.3             | 19    | 0.6                                         | 0.01  | 1.7   |
| M17        | 507                | 2.4                                           | 7.0             | -     | 0.7                                         | 0.13  | -     |
| M25        | 234                | 3.2                                           | 9.7             | 1.3   | 0.9                                         | 0.18  | 0.12  |
| M26        | 475                | 4.0                                           | 4.3             | 1.9   | 1.2                                         | 0.08  | 0.18  |
| M4         | 651                | 9.7                                           | 5.3             | -     | 2.8                                         | 0.1   | -     |
| M5         | 475                | 19                                            | 11              | -     | 5.4                                         | 0.19  | -     |
| M6         | 651                | 4.1                                           | 3.4             | -     | 1.2                                         | 0.06  | -     |
| M7         | 651                | 3.1                                           | 2.1             | -     | 0.9                                         | 0.04  | -     |
| M8         | 635                | 1.9                                           | ND <sup>c</sup> | -     | 0.5                                         | ND    | -     |
| M9         | 635                | 2.0                                           | 1.1             | -     | 0.6                                         | 0.02  | -     |
| M10        | 343                | 3.1                                           | 2.4             | -     | 0.9                                         | 0.05  | -     |
| M11        | 475                | 3.3                                           | 0.7             | -     | 1.0                                         | 0.01  | -     |
| M12        | 507                | 3.2                                           | 1.4             | -     | 0.9                                         | 0.03  | -     |
| M13        | 651                | 1.6                                           | ND              | -     | 0.5                                         | ND    | -     |
| M14        | 475                | ND                                            | 2.2             | -     | ND                                          | 0.04  | -     |
| M15        | 651                | ND                                            | 3.0             | -     | ND                                          | 0.06  | -     |
| M16        | 475                | ND                                            | 6.0             | -     | ND                                          | 0.10  | -     |
| M18        | 491                | Trace <sup>d</sup>                            | Trace           | 3.3   | -                                           | -     | 0.30  |
| M19        | 491                | Trace                                         | Trace           | -     | -                                           | -     | -     |
| M20        | 491                | Trace                                         | Trace           | -     | -                                           | -     | -     |
| M21        | 491                | Trace                                         | Trace           | -     | -                                           | -     | -     |
| M22        | 667                | Trace                                         | Trace           | -     | -                                           | -     | -     |
| M23        | 667                | Trace                                         | Trace           | -     | -                                           | -     | -     |
| M24        | 667                | Trace                                         | Trace           | -     | -                                           | -     | -     |
| P (BMS-A)  | 459                | 6.7                                           | 1.0             | 53    | 1.9                                         | 0.01  | 4.9   |
| Total      |                    | 69                                            | 61              | 78    | 20                                          | 1.1   | 7.2   |

<sup>a</sup> Radioactive peaks are reported as a percentage of the total radioactivity eluted from the column after background subtraction. <sup>b</sup> Radioactive peaks are reported as a percentage of the radioactive dose.

<sup>c</sup> ND = not determined. <sup>d</sup>Trace amounts by radioactivity but detectable by MS.

Table 2SB. Relative percent distribution of radioactivity among various peaks in the radiochromatographic profiles of pooled BMS-A/ABT-treated rat bile, urine, and feces after oral administration of [ $^{14}\text{C}$ ]BMS-A (15 mg/kg, 199.5  $\mu\text{Ci/kg}$ )

| Metabolite |                    | Relative distribution (% sample) <sup>a</sup> |                 |                    | Relative distribution (% dose) <sup>b</sup> |       |       |
|------------|--------------------|-----------------------------------------------|-----------------|--------------------|---------------------------------------------|-------|-------|
| M          | [M+H] <sup>+</sup> | Bile                                          | Urine           | Feces              | Bile                                        | Urine | Feces |
| M1         | 475                | 2.2                                           | 0.1             | 12                 | 0.18                                        | Trace | -     |
| M17        | 507                | 4.0                                           | 3.9             | -                  | 0.33                                        | 0.11  | -     |
| M25        | 234                | 2.9                                           | 6.8             | Trace <sup>c</sup> | 0.24                                        | 0.19  | -     |
| M26        | 475                | 7.4                                           | 8.4             | Trace              | 0.61                                        | 0.23  | -     |
| M4         | 651                | 20                                            | 2.1             | -                  | 1.6                                         | 0.06  | -     |
| M5         | 475                | ND                                            | 25              | -                  | ND                                          | 0.69  | -     |
| M6         | 651                | 20                                            | ND <sup>d</sup> | -                  | 1.6                                         | ND    | -     |
| M7         | 651                | 2.7                                           | 2.6             | -                  | 0.22                                        | 0.07  | -     |
| M8         | 635                | 1.5                                           | 0.9             | -                  | 0.13                                        | 0.03  | -     |
| M9         | 635                | 1.7                                           | ND              | -                  | 0.14                                        | ND    | -     |
| M10        | 343                | 2.9                                           | ND              | -                  | 0.24                                        | ND    | -     |
| M11        | 475                | 3.1                                           | 1.2             | -                  | 0.25                                        | 0.03  | -     |
| M12        | 507                | 1.9                                           | 2.2             | -                  | 0.16                                        | 0.06  | -     |
| M13        | 651                | 1.5                                           | ND              | -                  | 0.12                                        | ND    | -     |
| M14        | 475                | ND                                            | 2.2             | -                  | ND                                          | 0.06  | -     |
| M15        | 651                | ND                                            | 1.2             | -                  | ND                                          | 0.03  | -     |
| M16        | 475                | ND                                            | 6.2             | -                  | ND                                          | 0.17  | -     |
| M18        | 491                | Trace                                         | Trace           | Trace              | -                                           | -     | -     |
| M19        | 491                | Trace                                         | Trace           | -                  | -                                           | -     | -     |
| M20        | 491                | Trace                                         | Trace           | -                  | -                                           | -     | -     |
| M21        | 491                | Trace                                         | Trace           | -                  | -                                           | -     | -     |
| M22        | 667                | Trace                                         | Trace           | -                  | -                                           | -     | -     |
| M23        | 667                | Trace                                         | Trace           | -                  | -                                           | -     | -     |
| M24        | 667                | Trace                                         | Trace           | -                  | -                                           | -     | -     |
| P (BMS-A)  | 459                | 2.6                                           | 1.0             | 86                 | 0.21                                        | 0.04  | 3.5   |
| Total      |                    | 74                                            | 63              | 97                 | 6.1                                         | 1.8   | 4.0   |

<sup>a</sup> Radioactive peaks are reported as a percentage of the total radioactivity eluted from the column after background subtraction.

<sup>b</sup> Radioactive peaks are reported as a percentage of the radioactive dose.

<sup>c</sup> Trace amounts by radioactivity and detectable by LC/MS.

<sup>d</sup> ND = not determined.



Figure 1S. Modified after Rainey et al., Mol Cell End, 228: 23-38 and Stewart in William's Textbook of Endocrinology, Larsen et al., Eds.

### Steroidogenic pathways in humans and animals

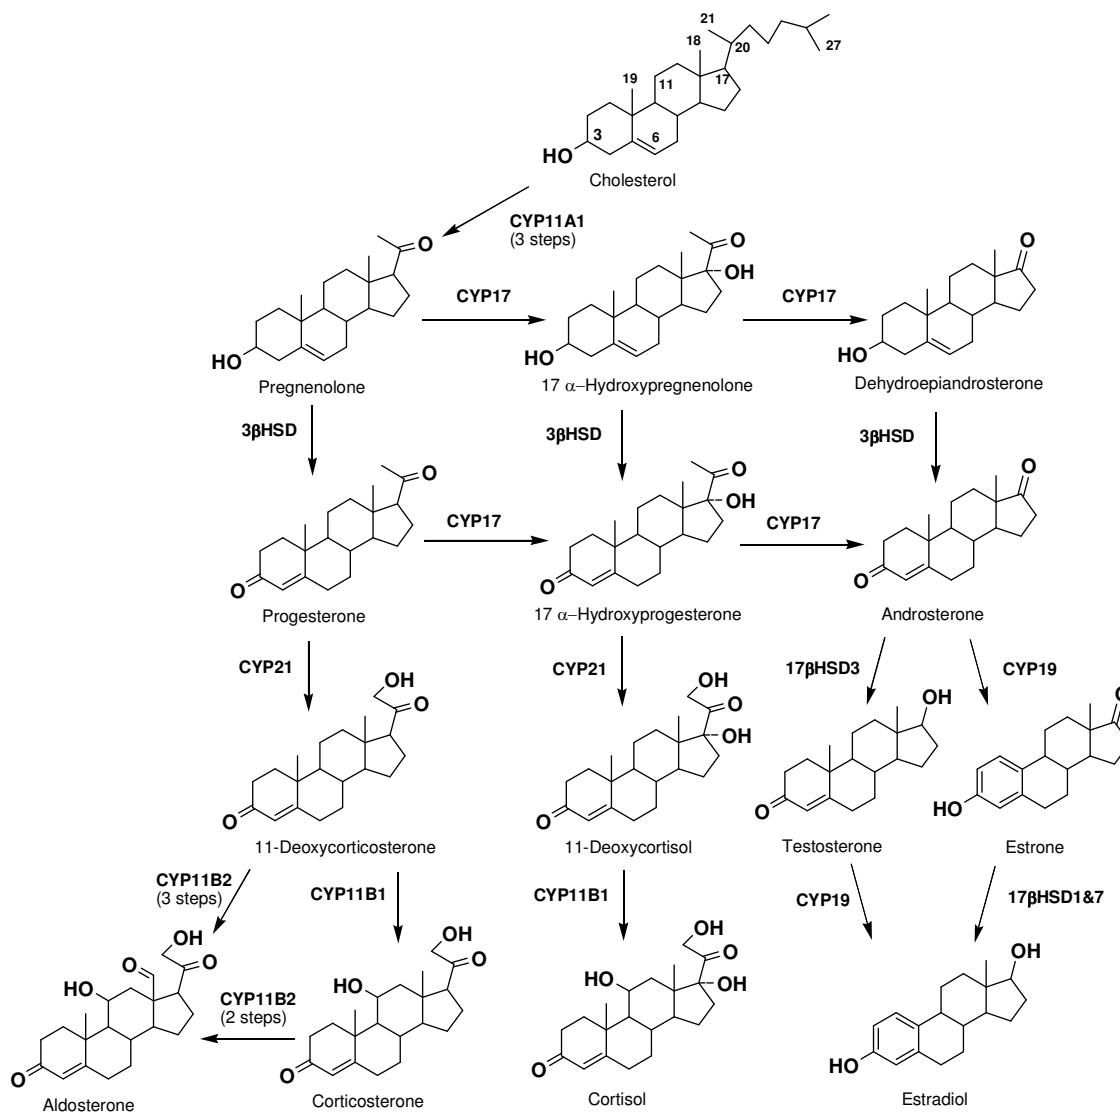

Figure 2SA. Adrenal cortex of a rat following single daily oral doses of 10 mg/kg BMS-A for 7 days

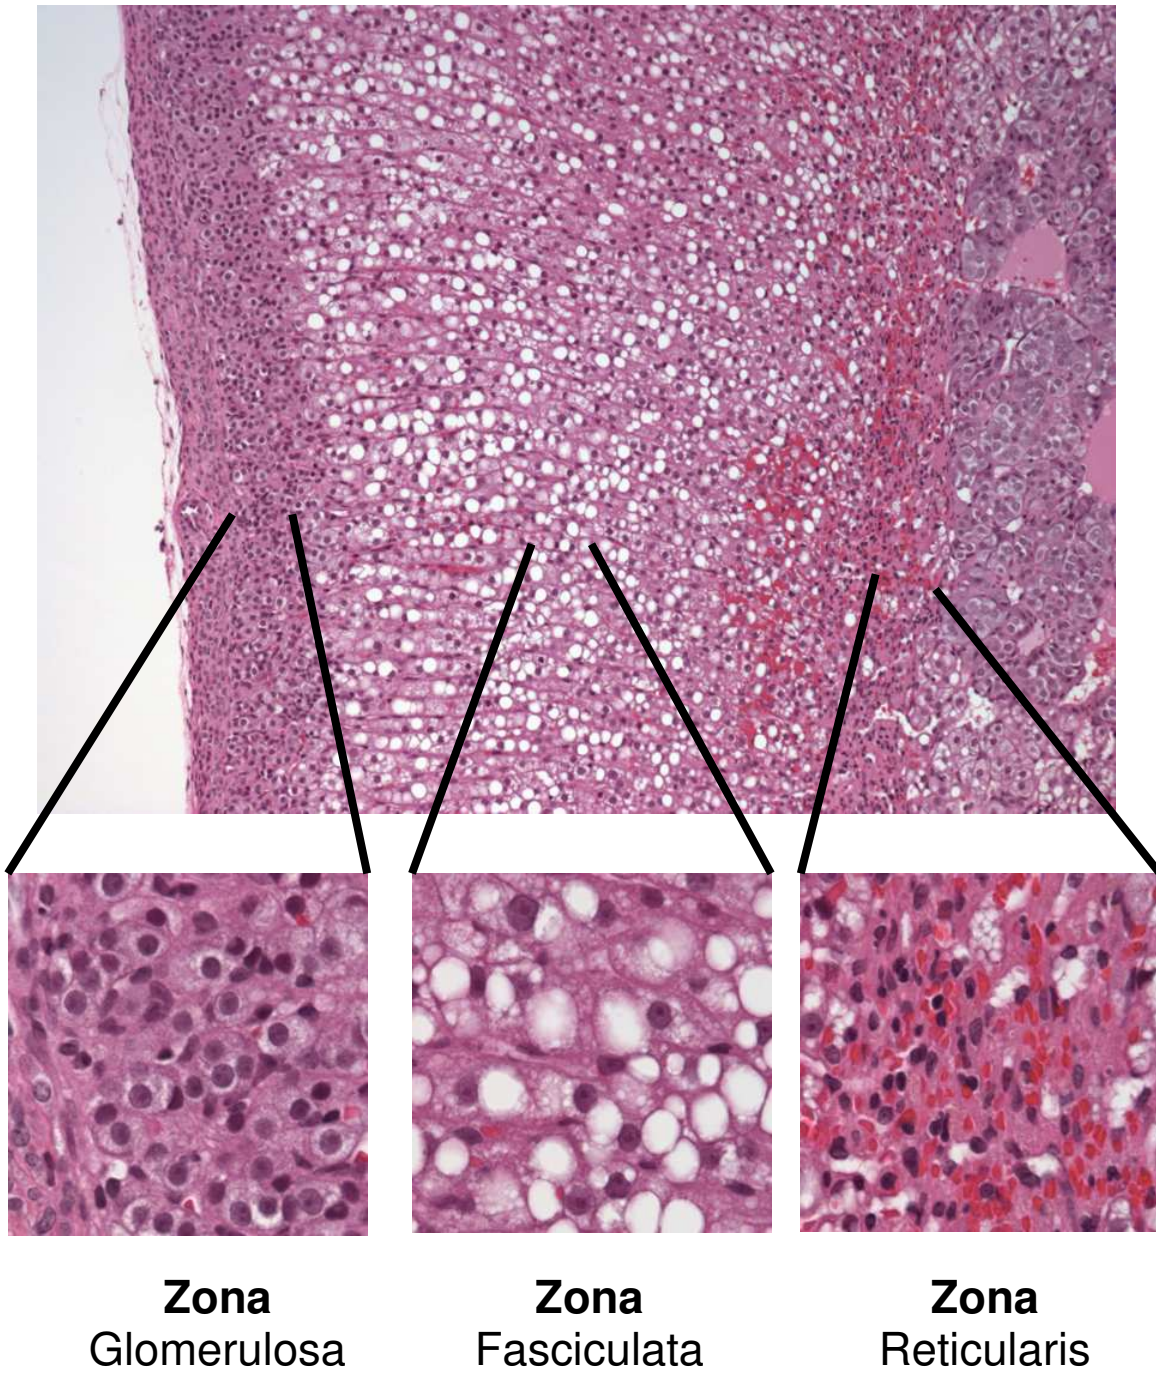

Figure 2SB. Adrenal cortex of a rat following a single oral dose of 30 mg/kg BMS-A

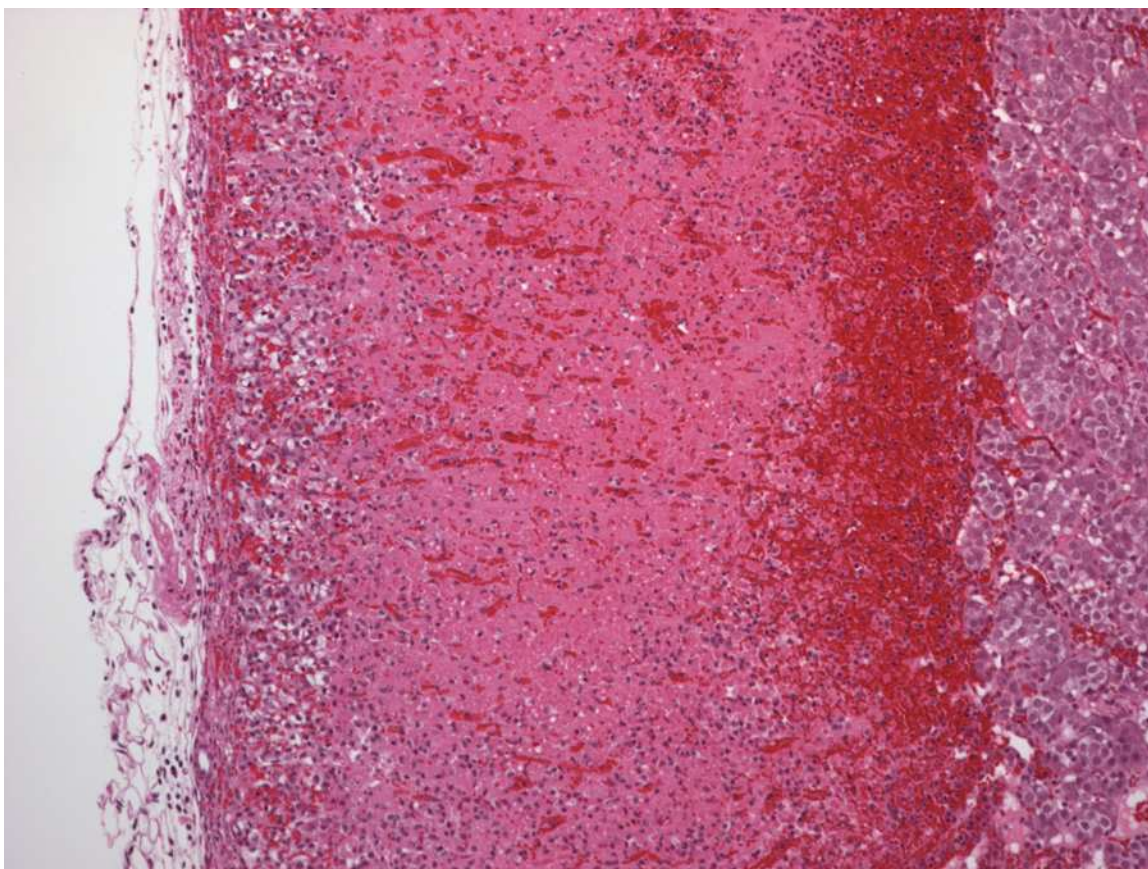

Figure 3SA: Profiles of radioactivity in bile of rats following oral administration of [ $^{14}\text{C}$ ]BMS-A (15 mg/kg, 199.5  $\mu\text{Ci/kg}$ ) with and without pretreatment of ABT (1,2,3....= M1, M2, M3....)

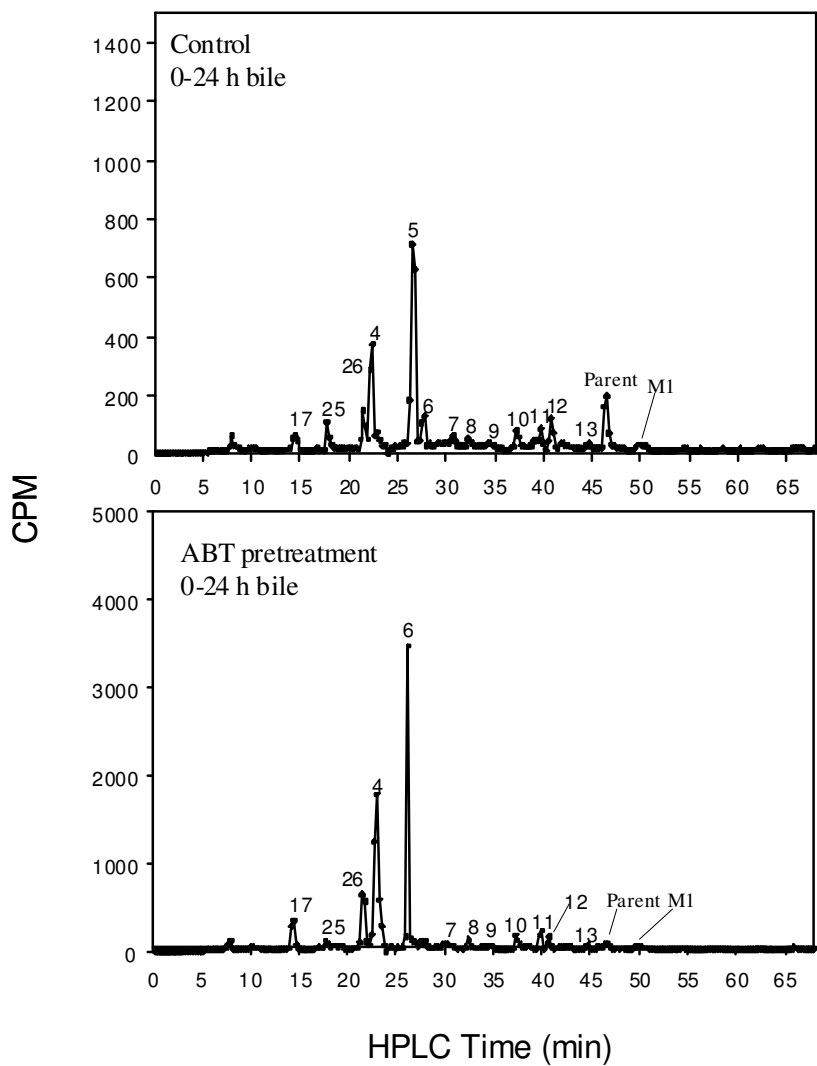

Figure 3SB: Profiles of radioactivity in urine of rats following oral administration of [ $^{14}\text{C}$ ]BMS-A (15 mg/kg, 199.5  $\mu\text{Ci/kg}$ ) with and without pretreatment of ABT (1,2,3....=M1, M2, M3....)

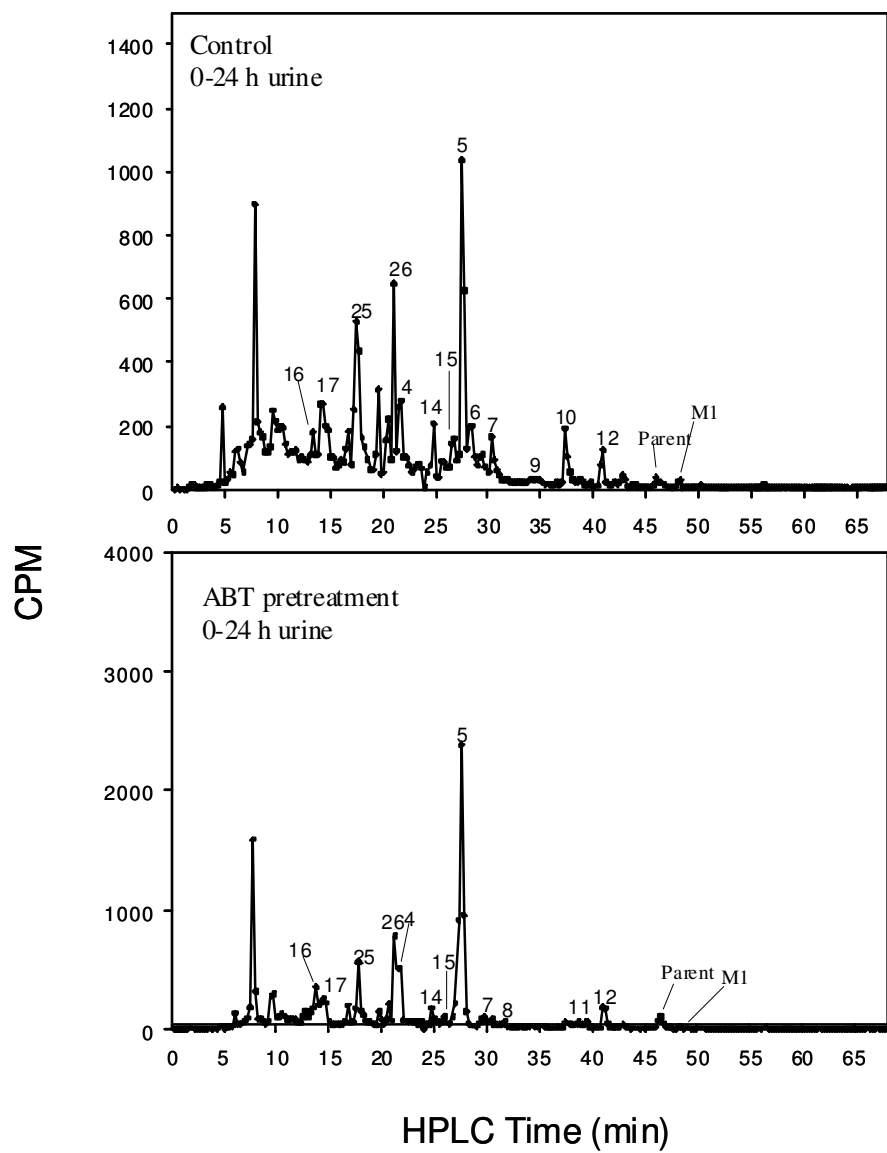

Figure 3SC: Profiles of radioactivity in feces of rats following oral administration of [ $^{14}\text{C}$ ]BMS-A (15 mg/kg, 199.5  $\mu\text{Ci/kg}$ ) with and without pretreatment of ABT (1,2,3....=M1, M2, M3....)

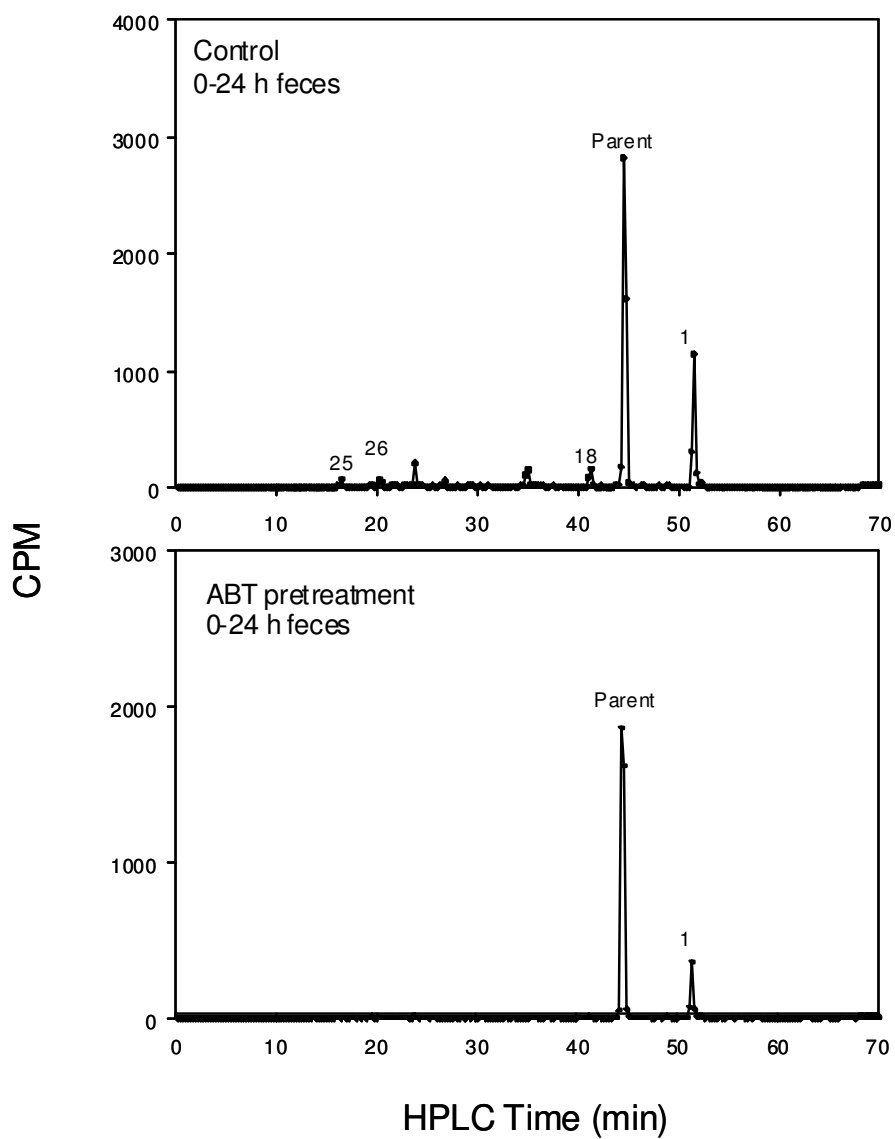

Figure 4SA. HPLC profiles of radioactivity in rat plasma from the untreated group after oral administration of [ $^{14}\text{C}$ ]BMS-A (15 mg/kg, 199.5  $\mu\text{Ci/kg}$ )

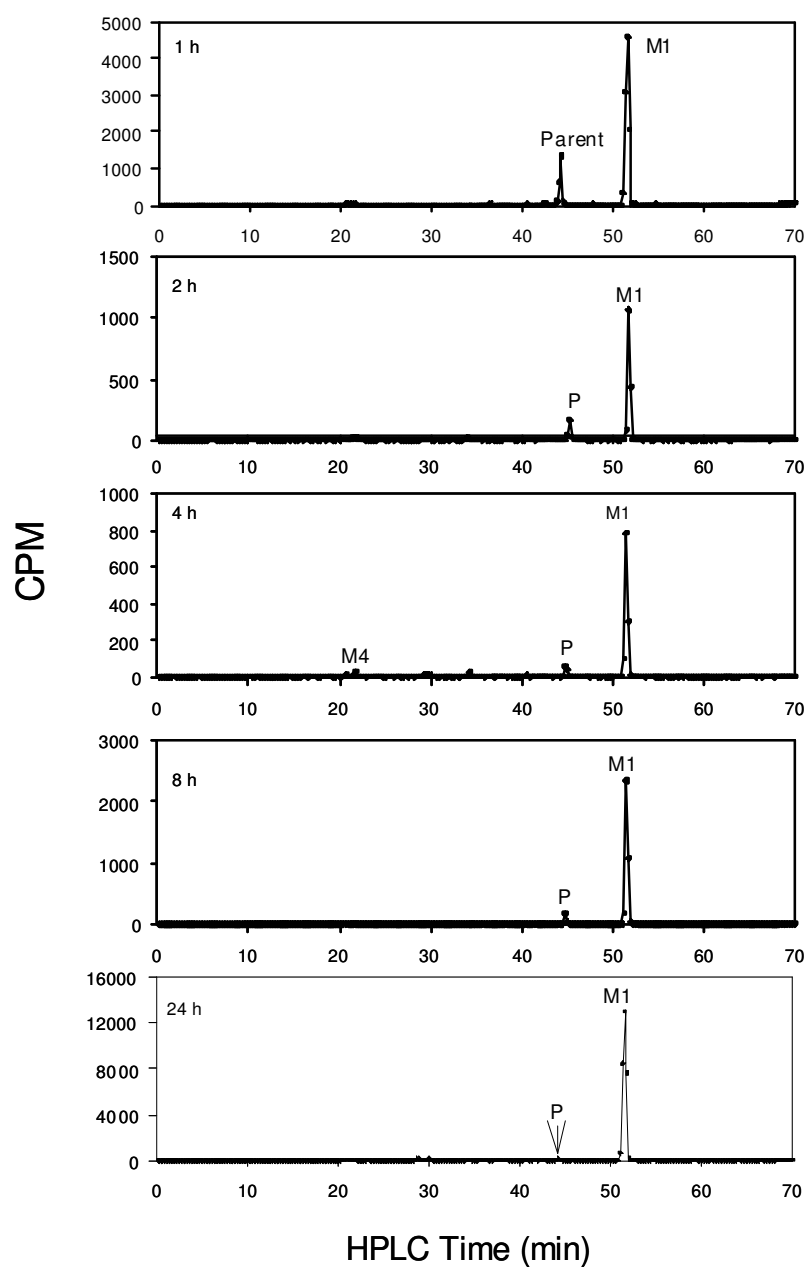



Figure 4SB. HPLC profiles of radioactivity in plasma from ABT-pretreated group after oral administration of [ $^{14}\text{C}$ ]BMS-A (15 mg/kg, 199.5  $\mu\text{Ci/kg}$ )

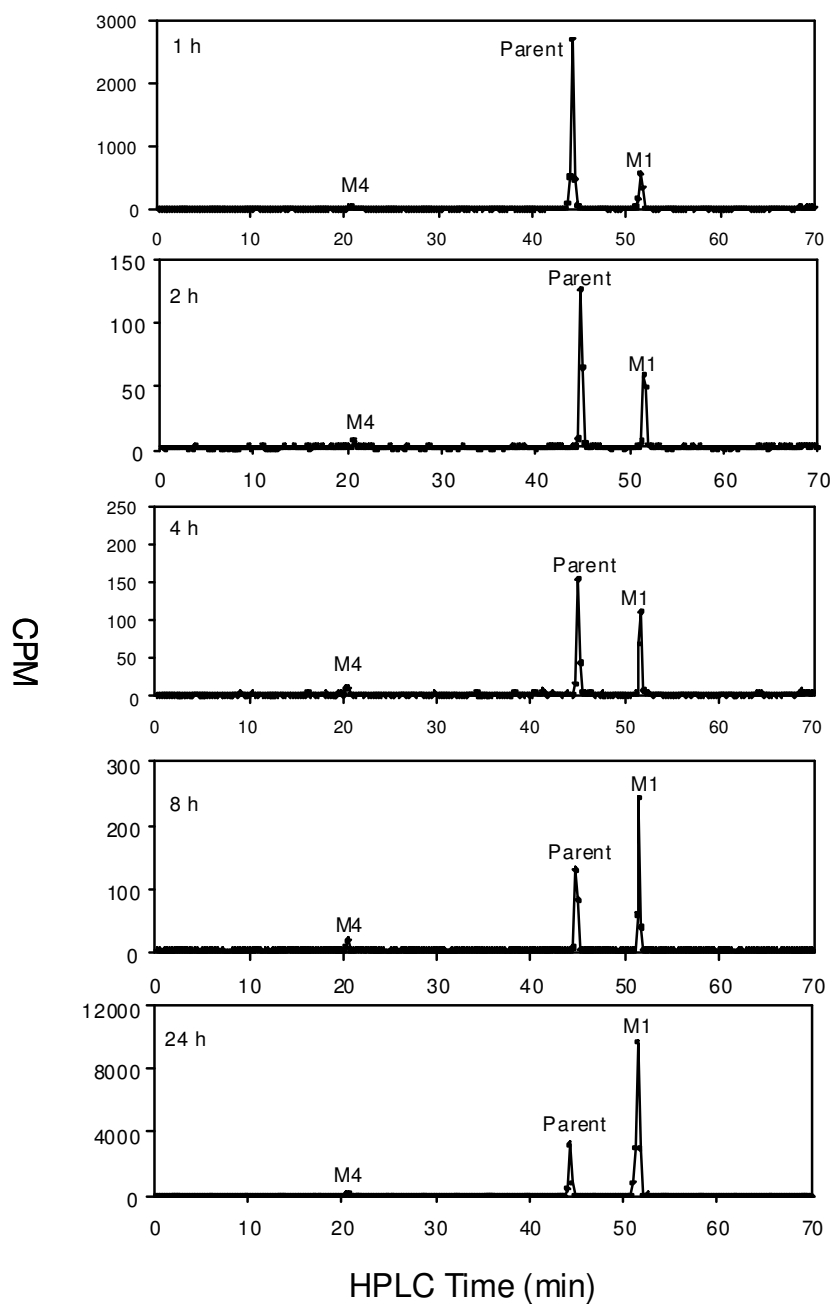



Figure 5S. Metabolite profiles of radioactivity in the medium after a 24h incubation of [ $^{14}$ C]BMS-A (10  $\mu$ M) with Y1 cell cultures

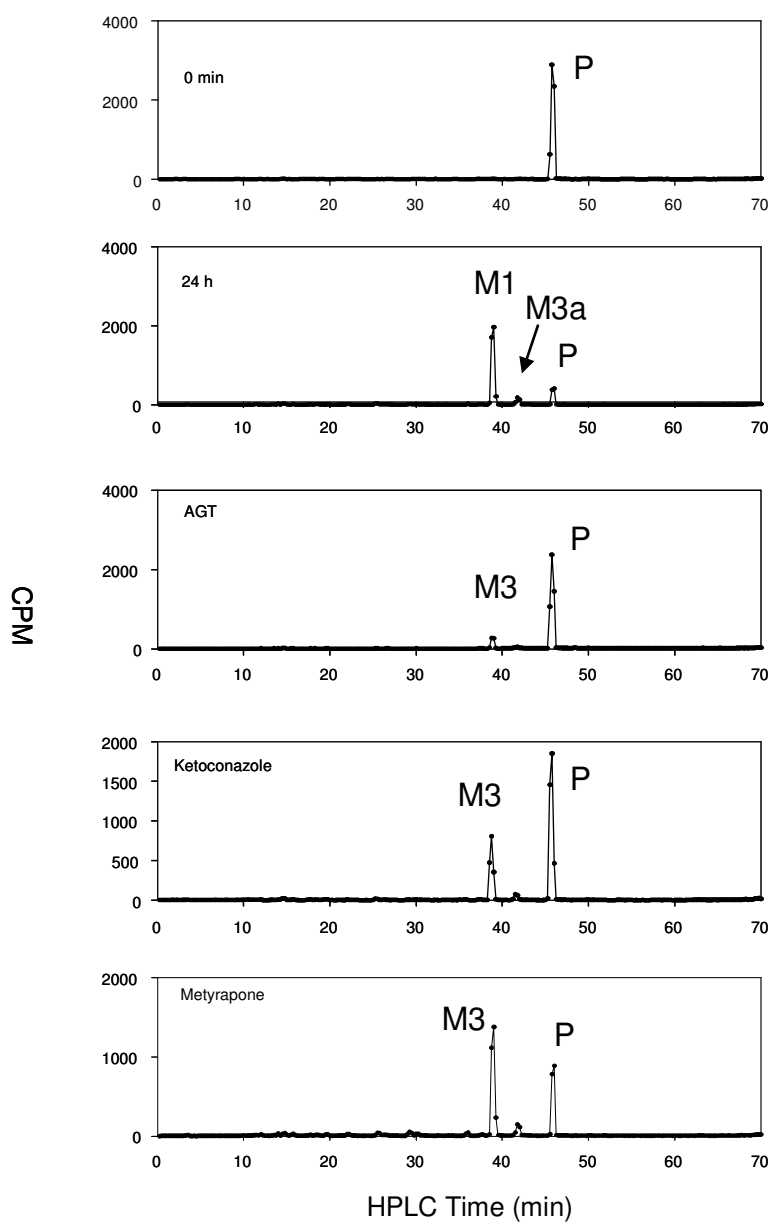

Supplement: Supplementary file 1 [file 4182310]
